# Supplementary material
Source: publisher figshare collection journal article supplement (https://acs.figshare.com/ndownloader/files/21820581)
Supplement: Supplementary file 1 [file 21820581]

## Sheet: cover
Fast, Accurate and Reliable Protocols for Routine Calculations of Protein-Ligand Binding Affinities in Drug-Design Projects Using AMBER GPU-TI with ff14SB/GAFF.
Xibing He,† Shuhan Liu,† Tai-Sung Lee,‡ Beihong Ji,† Viet H. Man,† Darrin M. York,‡ and Junmei Wang*,†
† Department of Pharmaceutical Sciences and Computational Chemical Genomics Screening Center, School of Pharmacy, University of Pittsburgh, Pittsburgh, Pennsylvania 15261, United States
‡ Laboratory for Biomolecular Simulation Research, Center for Integrative Proteomics Research, and Department of Chemistry and Chemical Biology, Rutgers University, Piscataway, New Jersey 08854, United States
* Corresponding author: Junmei Wang. Phone: (412) 383-3268. Fax: (412) 383-7436. E-mail: juw79@pitt.edu

## Sheet: bace
BACE system
ΔG: binding free energy for a ligand
ΔΔG: relative binding free energy for a mutation pair
SE: signed error
UE: unsigned error
SchrodingerID	ligands	exptΔG	calcΔG	SE	UE	SE^2		formula to derive calcΔG
NA	1	-7.43	-7.43	0	0	0		ΔG_expt(1)
CAT-4a	4a	-7.48	-8.545	-1.065	1.065	1.13422		ΔG_expt(1) + ΔΔG(1~4a)
CAT-4b	4b	-9.17	-9.087	0.083	0.083	0.006889		ΔG(4a) + ΔΔG(4a~4b)
CAT-4c	4c	-7.39	-9.262	-1.872	1.872	3.50438		ΔG(4a) + ΔΔG(4a~4c)
CAT-4d	4d	-8.65	-9.871	-1.221	1.221	1.49084		ΔG(4b) + ΔΔG(4b~4d)
NA	4e	-8.38	-7.665	0.715	0.715	0.511225		ΔG_expt(1) + ΔΔG(1~4e)
NA	4f	-8.9	-8.297	0.603	0.603	0.363609		ΔG_expt(1) + ΔΔG(1~4f)
NA	4g	-8.54	-7.867	0.673	0.673	0.452929		ΔG_expt(1) + ΔΔG(1~4g)
NA	4h	-8.77	-7.757	1.013	1.013	1.02617		ΔG_expt(1) + ΔΔG(1~4h)
CAT-4i	4i	-7.81	-7.919	-0.109	0.109	0.011881		ΔG(4a) – ΔΔG(4i~4a)
CAT-4j	4j	-8.56	-8.052	0.508	0.508	0.258064		ΔG(4a) – ΔΔG(4j~4a)
CAT-4k	4k	-7.39	-7.745	-0.355	0.355	0.126025		ΔG(4a) – ΔΔG(4k~4a)
CAT-4l	4l	-8.88	-8.081	0.799	0.799	0.638401		ΔG(4a) – ΔΔG(4l~4a)
CAT-4m	4m	-8.69	-10.494	-1.804	1.804	3.25442		ΔG(4j) + ΔΔG(4j~4m)
CAT-4n	4n	-8.63	-8.493	0.137	0.137	0.018769		ΔG(4j) + ΔΔG(4j~4n)
CAT-4o	4o	-8.92	-8.504	0.416	0.416	0.173056		ΔG(4j) + ΔΔG(4j~4o)
CAT-4p	4p	-9.61	-9.284	0.326	0.326	0.106276		ΔG(4j) + ΔΔG(4j~4p)
CAT-13a	13a	-8.38	-8.972	-0.592	0.592	0.350464		ΔG(4a) – ΔΔG(13x~4a)+ΔΔG(13x~13a)
CAT-13b	13b	-8.66	-8.662	-0.002	0.002	4e-06		{[ΔG(13a) + ΔΔG(13a~13b)] + [ΔG(4a) – ΔΔG(13x~4a)+ΔΔG(13x~13b)]}/2
CAT-13c	13c	-8.86	-8.03	0.829	0.829	0.687241		{[ΔG(13a) + ΔΔG(13a~13c)] + [ΔG(4a) – ΔΔG(13x~4a)+ΔΔG(13x~13c)]}/2
CAT-13d	13d	-10	-10.498	-0.498	0.498	0.248004		{[ΔG(13a) + ΔΔG(13a~13d)] + [ΔG(4a) – ΔΔG(13x~4a)+ΔΔG(13x~13d)]}/2
CAT-13e	13e	-9.49	-8.245	1.245	1.245	1.55003		{[ΔG(13a) + ΔΔG(13a~13e)] + [ΔG(4a) – ΔΔG(13x~4a)+ΔΔG(13x~13e)]}/2
CAT-13f	13f	-8.63	-9.072	-0.441	0.441	0.194481		{[ΔG(13a) + ΔΔG(13a~13f)] + [ΔG(4a) – ΔΔG(13x~4a)+ΔΔG(13x~13f)]}/2
CAT-13g	13g	-8.63	-7.907	0.723	0.723	0.522729		{[ΔG(13a) + ΔΔG(13a~13g)] + [ΔG(4a) – ΔΔG(13x~4a)+ΔΔG(13x~13g)]}/2
CAT-13h	13h	-9.17	-7.905	1.265	1.265	1.60022		{[ΔG(13a) + ΔΔG(13a~13h)] + [ΔG(4a) – ΔΔG(13x~4a)+ΔΔG(13x~13h)]}/2
CAT-13i	13i	-8.81	-10.357	-1.547	1.547	2.39321		{[ΔG(13a) + ΔΔG(13a~13i)] + [ΔG(4a) – ΔΔG(13x~4a)+ΔΔG(13x~13i)]}/2
CAT-13j	13j	-8.27	-9.069	-0.799	0.799	0.638401		{[ΔG(4a) – ΔΔG(13j~4a)] + [ΔG(4a) – ΔΔG(13x~4a)+ΔΔG(13x~13j)]}/2
CAT-13k	13k	-9.24	-10.69	-1.45	1.45	2.1025		{[ΔG(4a) – ΔΔG(13k~4a)] + [ΔG(4a) – ΔΔG(13x~4a)+ΔΔG(13x~13k)]+[ΔG(13a) + ΔΔG(13a~13k)]}/3
CAT-13m	13m	-8.3	-9.819	-1.519	1.519	2.30736		{[ΔG(4a) – ΔΔG(13m~4a)] + [ΔG(4a) – ΔΔG(13x~4a)+ΔΔG(13x~13m)]}/2
CAT-13n	13n	-8.08	-7.013	1.067	1.067	1.13849		{[ΔG(4a) – ΔΔG(13n~4a)] + [ΔG(4a) – ΔΔG(13x~4a)+ΔΔG(13x~13n)]+[ΔG(13a) + ΔΔG(13a~13n)]}/3
CAT-13o	13o	-8.08	-8.337	-0.257	0.257	0.066049		ΔG(4a) – ΔΔG(13x~4a)+ΔΔG(13x~13o)
CAT-17a	17a	-10.26	-10.715	-0.455	0.455	0.207025		ΔG(13d) +ΔΔG(13d~17a)
CAT-17b	17b	-9.56	-10.13	-0.569	0.569	0.323761		ΔG(13d) +ΔΔG(13d~17b)
CAT-17c	17c	-9.39	-8.758	0.633	0.633	0.400689		ΔG(13d) +ΔΔG(13d~17c)
CAT-17d	17d	-8.96	-6.918	2.042	2.042	4.16976		ΔG(13d) -ΔΔG(17d~13d)
CAT-17h	17h	-9.86	-9.986	-0.126	0.126	0.015876		ΔG(13d) +ΔΔG(13d~17h)
CAT-17e	17e	-9.55	-9.974	-0.424	0.424	0.179776		{[ΔG(17b) - ΔΔG(17e~17b)] + [ΔG(17h) + ΔΔG(17h~17e)]}/2
CAT-17f	17f	-8.96	-8.521	0.439	0.439	0.192721		{[ΔG(17c) - ΔΔG(17f~17c)] + [ΔG(17h) + ΔΔG(17h~17e)]}/2
CAT-17g	17g	-9.27	-8.13	1.14	1.14	1.2996		ΔG(17h) +ΔΔG(17h~17g)
CAT-17i	17i	-9.01	-9.367	-0.357	0.357	0.127449		ΔG(17h) +ΔΔG(17h~17i)
CAT-24	24	-11.28	-12.606	-1.326	1.326	1.75828		ΔG(17f) +ΔΔG(17f~24)
#	#min	-11.28	-12.606
#	#max	-7.39	-6.92
#	#MSE	#	#	-0.052
#	#MUE	#	#	0.767	0.766927
#	#RMSE	#	#	0.931		0.931184
#	#PI	#	#	0.564
#	#r	#	#	0.609
Lig1	Lig2	exptΔΔG	calcΔΔG	SE	UE	SE^2
1	4a	-0.05	-1.11	-1.06	1.06	1.1236
1	4e	-0.95	-0.23	0.72	0.72	0.5184
1	4f	-1.47	-0.87	0.6	0.6	0.36
1	4g	-1.11	-0.44	0.67	0.67	0.4489
1	4h	-1.34	-0.33	1.01	1.01	1.0201
4a	4b	-1.69	-0.54	1.15	1.15	1.3225
4a	4c	0.09	-0.72	-0.81	0.81	0.6561
4b	4d	0.52	-0.78	-1.3	1.3	1.69
4i	4a	0.33	-0.63	-0.96	0.96	0.9216
4j	4a	1.08	-0.49	-1.57	1.57	2.4649
4j	4m	-0.13	-2.44	-2.31	2.31	5.3361
4j	4n	-0.07	-0.44	-0.37	0.37	0.1369
4j	4o	-0.36	-0.45	-0.09	0.09	0.0081
4j	4p	-1.05	-1.23	-0.18	0.18	0.0324
4k	4a	-0.09	-0.8	-0.71	0.71	0.5041
4l	4a	1.4	-0.46	-1.86	1.86	3.4596
13a	13b	-0.28	-0.24	0.04	0.04	0.0016
13a	13c	-0.48	0.91	1.39	1.39	1.9321
13a	13d	-1.62	-1.7	-0.08	0.08	0.0064
13a	13e	-1.11	1.42	2.53	2.53	6.4009
13a	13f	-0.25	-0.26	-0.01	0.01	0.0001
13a	13g	-0.25	1.23	1.48	1.48	2.1904
13a	13h	-0.79	1.85	2.64	2.64	6.9696
13a	13i	-0.43	-1.99	-1.56	1.56	2.4336
13a	13k	-0.86	-2.02	-1.16	1.16	1.3456
13a	13n	0.3	0.7	0.4	0.4	0.16
13d	17a	-0.26	-0.22	0.04	0.04	0.0016
13d	17b	0.44	0.37	-0.07	0.07	0.0049
13d	17c	0.61	1.74	1.13	1.13	1.2769
13d	17h	0.14	0.51	0.37	0.37	0.1369
13j	4a	0.79	1.13	0.34	0.34	0.1156
13k	4a	1.76	2.87	1.11	1.11	1.2321
13m	4a	0.82	0.74	-0.08	0.08	0.0064
13n	4a	0.6	-2.03	-2.63	2.63	6.9169
17d	13d	-1.04	-3.58	-2.54	2.54	6.4516
17e	17b	-0.01	-0.17	-0.16	0.16	0.0256
17f	17c	-0.43	-0.34	0.09	0.09	0.0081
17f	24	-2.32	-4.085	-1.765	1.765	3.11523
17h	17e	0.31	0	-0.31	0.31	0.0961
17h	17f	0.9	1.36	0.46	0.46	0.2116
17h	17g	0.59	1.86	1.27	1.27	1.6129
17h	17i	0.85	0.62	-0.23	0.23	0.0529
#	#RMSE	#	#	#	#	1.22191
#	#MUE	#	#	#	0.934643
Lig1	Lig2	exptΔΔG	calcΔΔG
13x~4a	13x~4a	na	0.76
13x~13a	13x~13a	na	0.33
13x~13b	13x~13b	na	1.19
13x~13c	13x~13c	na	1.3
13x~13d	13x~13d	na	-1.02
13x~13e	13x~13e	na	0.36
13x~13f	13x~13f	na	0.39
13x~13g	13x~13g	na	1.23
13x~13h	13x~13h	na	0.62
13x~13i	13x~13i	na	-0.45
13x~13j	13x~13j	na	0.84
13x~13k	13x~13k	na	-0.36
13x~13m	13x~13m	na	-1.05
13x~13n	13x~13n	na	3.05
13x~13o	13x~13o	na	0.96

## Sheet: cdk2
CDK2 system
ΔG: binding free energy for a ligand
ΔΔG: relative binding free energy for a mutation pair
SE: signed error
UE: unsigned error
SchrodingerID	ligands	exptΔG	calcΔG	SE	UE	SE^2		formula to derive calcΔG
1h1q	2	-8.2	-8.2	0	0	0		ΔG_expt(2)
1h1s	3	-11.28	-10.35	0.93	0.93	0.8649		ΔG(2) + ΔΔG(2~3)
1h1r	15	-7.69	-9.51	-1.82	1.82	3.3124		ΔG(2) + ΔΔG(2~15)
17	17	-7.05	-9.08	-2.03	2.03	4.1209		ΔG(2) + ΔΔG(2~17)
NA	18	-6.71	-9.19	-2.48	2.48	6.1504		ΔG(2) + ΔΔG(2~18)
20	20	-8.73	-9.22	-0.49	0.49	0.2401		ΔG(2) + ΔΔG(2~20)
21	21	-7.84	-8.98	-1.14	1.14	1.2996		ΔG(2) + ΔΔG(2~21)
22	22	-7.87	-9.13	-1.26	1.26	1.5876		ΔG(2) + ΔΔG(2~22)
1oi9	25	-9.77	-9.66	0.11	0.11	0.0121		ΔG(2) + ΔΔG(2~25)
26	26	-8.44	-9.12	-0.68	0.68	0.4624		ΔG(25) + ΔΔG(25~26)
28	28	-11.13	-10.68	0.45	0.45	0.2025		ΔG(3) + ΔΔG(3~28)
29	29	-9.89	-10.84	-0.95	0.95	0.9025		ΔG(3) + ΔΔG(3~29)
30	30	-9.82	-10.37	-0.55	0.55	0.3025		ΔG(2) + ΔΔG(2~30)
31	31	-9.55	-10.28	-0.73	0.73	0.5329		ΔG(2) + ΔΔG(2~31)
32	32	-9.76	-10.3	-0.54	0.54	0.2916		{[ΔG(3) + ΔΔG(3~32)] + [ΔG(21) + ΔΔG(21~32)]}/2
1oiu	33	-9.11	-10.69	-1.58	1.58	2.4964		ΔG(2) + ΔΔG(2~33)
1oiy	34	-9.81	-9.37	0.44	0.44	0.1936		ΔG(2) + ΔΔG(2~34)
NA	36	-9.14	-9.11	0.03	0.03	0.0009		ΔG(34) + ΔΔG(34~36)
NA	37	-9.14	-8.84	0.3	0.3	0.09		ΔG(34) + ΔΔG(34~37)
NA	38	-8.9	-8.82	0.08	0.08	0.0064		ΔG(2) + ΔΔG(2~38)
NA	41	-9.39	-9.18	0.21	0.21	0.0441		ΔG(2) + ΔΔG(2~41)
NA	42	-8.9	-9.63	-0.73	0.73	0.5329		ΔG(2) + ΔΔG(2~42)
#	#min	-11.28	-10.84
#	#max	-6.71	-8.2
#	#MSE	#	#	-0.57
#	#MUE	#	#	0.8	0.796818
#	#RMSE	#	#	1.04		1.03675
#	#PI	#	#	0.62
#	#r	#	#	0.64
Lig1	Lig2	exptΔΔG	calcΔΔG	SE	UE	SE^2
2	3	-3.08	-2.149	0.931	0.931	0.866761
2	15	0.51	-1.315	-1.825	1.825	3.33062
2	17	1.15	-0.88	-2.03	2.03	4.1209
2	18	1.49	-0.991	-2.481	2.481	6.15536
2	20	-0.53	-1.02	-0.49	0.49	0.2401
2	21	0.36	-0.777	-1.137	1.137	1.29277
2	22	0.33	-0.926	-1.256	1.256	1.57754
2	25	-1.57	-1.463	0.107	0.107	0.011449
2	30	-1.62	-2.167	-0.547	0.547	0.299209
2	31	-1.35	-2.079	-0.729	0.729	0.531441
2	33	-0.91	-2.486	-1.576	1.576	2.48378
2	34	-1.61	-1.168	0.442	0.442	0.195364
2	38	-0.7	-0.617	0.083	0.083	0.006889
2	41	-1.19	-0.984	0.206	0.206	0.042436
2	42	-0.7	-1.434	-0.734	0.734	0.538756
21	32	-1.92	-1.145	0.775	0.775	0.600625
25	26	1.33	0.539	-0.791	0.791	0.625681
3	28	0.15	-0.33	-0.48	0.48	0.2304
3	29	1.39	-0.49	-1.88	1.88	3.5344
3	32	1.52	-0.123	-1.643	1.643	2.69945
34	36	0.67	0.255	-0.415	0.415	0.172225
34	37	0.67	0.525	-0.145	0.145	0.021025
#	#RMSE	#	#	#	#	1.15949
#	#MUE	#	#	#	0.941045

## Sheet: mcl1
MCL1 system
ΔG: binding free energy for a ligand
ΔΔG: relative binding free energy for a mutation pair
SE: signed error
UE: unsigned error
SchrodingerID	ligands	exptΔG	calcΔG	SE	UE	SE^2		formula to derive calcΔG
27	27	-6.08	-6.08	0	0	0		ΔG_expt(27)
28	28	-6.58	-6.623	-0.043	0.043	0.001849		ΔG(27) + ΔΔG(27~28)
29	29	-6.9	-6.831	0.069	0.069	0.004761		ΔG(27) + ΔΔG(27~29)
30	30	-7.81	-6.824	0.986	0.986	0.972196		ΔG(27) + ΔΔG(27~30)
31	31	-7.87	-8.302	-0.432	0.432	0.186624		ΔG(27) + ΔΔG(27~31)
32	32	-6.54	-6.9	-0.36	0.36	0.1296		ΔG(27) + ΔΔG(27~32)
33	33	-6.83	-7.566	-0.736	0.736	0.541696		ΔG(27) + ΔΔG(27~33)
34	34	-6.83	-7.394	-0.564	0.564	0.318096		ΔG(27) + ΔΔG(27~34)
35	35	-8.76	-8.738	0.022	0.022	0.000484		ΔG(27) + ΔΔG(27~35)
36	36	-8.13	-9.041	-0.911	0.911	0.829921		ΔG(27) + ΔΔG(27~36)
37	37	-8.9	-9.375	-0.475	0.475	0.225625		ΔG(27) + ΔΔG(27~37)
38	38	-6.98	-8.379	-1.399	1.399	1.9572		ΔG(27) -RT*ln{[exp(-ΔΔG(27~38a)/RT)+exp(-ΔΔG(27~38b)/RT)]/2.0}
39	39	-6.98	-8.693	-1.713	1.713	2.93437		ΔG(27) + ΔΔG(27~39)
40	40	-7.21	-9.549	-2.339	2.339	5.47092		ΔG(27) -RT*ln{[exp(-ΔΔG(27~40a)/RT)+exp(-ΔΔG(27~40b)/RT)]/2.0}
41	41	-7.09	-8.422	-1.332	1.332	1.77422		ΔG(27) + ΔΔG(27~41)
42	42	-8.84	-7.539	1.301	1.301	1.6926		ΔG(27) -RT*ln{[exp(-ΔΔG(27~42a)/RT)+exp(-ΔΔG(27~42b)/RT)]/2.0}
43	43	-6.99	-7.922	-0.932	0.932	0.868624		ΔG(27) -RT*ln{[exp(-ΔΔG(27~43a)/RT)+exp(-ΔΔG(27~43b)/RT)]/2.0}
44	44	-8.62	-9.383	-0.763	0.763	0.582169		ΔG(27) -RT*ln{[exp(-ΔΔG(27~44a)/RT)+exp(-ΔΔG(27~44b)/RT)]/2.0}
45	45	-8.9	-9.289	-0.389	0.389	0.151321		ΔG(27) -RT*ln{[exp(-ΔΔG(27~45a)/RT)+exp(-ΔΔG(27~45b)/RT)]/2.0}
46	46	-7.55	-8.629	-1.079	1.079	1.16424		ΔG(27) -RT*ln{[exp(-ΔΔG(27~46a)/RT)+exp(-ΔΔG(27~46b)/RT)]/2.0}
47	47	-5.74	-7.775	-2.035	2.035	4.14123		ΔG(27) -RT*ln{[exp(-ΔΔG(27~47a)/RT)+exp(-ΔΔG(27~47b)/RT)]/2.0}
48	48	-6.62	-6.425	0.195	0.195	0.038025		ΔG(27) -RT*ln{[exp(-ΔΔG(27~48a)/RT)+exp(-ΔΔG(27~48b)/RT)]/2.0}
49	49	-8.31	-8.987	-0.677	0.677	0.458329		ΔG(27) + ΔΔG(27~49)
50	50	-9.27	-10.796	-1.526	1.526	2.32868		ΔG(27) + ΔΔG(27~50)
51	51	-8.4	-8.642	-0.242	0.242	0.058564		ΔG(27) -RT*ln{[exp(-ΔΔG(27~51a)/RT)+exp(-ΔΔG(27~51b)/RT)]/2.0}
52	52	-9.17	-8.708	0.462	0.462	0.213444		ΔG(27) + ΔΔG(27~52)
53	53	-9.9	-8.966	0.934	0.934	0.872356		ΔG(27) + ΔΔG(27~53)
54	54	-9.72	-9.174	0.546	0.546	0.298116		ΔG(27) -RT*ln{[exp(-ΔΔG(27~54a)/RT)+exp(-ΔΔG(27~54b)/RT)]/2.0}
NA	55	-9.8	-9.815	-0.015	0.015	0.000225		ΔG(27) -RT*ln{[exp(-ΔΔG(27~55a)/RT)+exp(-ΔΔG(27~55b)/RT)]/2.0}
56	56	-9.2	-9.033	0.167	0.167	0.027889		ΔG(27) + ΔΔG(27~56)
57	57	-8.98	-7.65	1.33	1.33	1.7689		ΔG(27) -RT*ln{[exp(-ΔΔG(27~57a)/RT)+exp(-ΔΔG(27~57b)/RT)]/2.0}
58	58	-9.35	-10.765	-1.415	1.415	2.00223		ΔG(27) + ΔΔG(27~58)
NA	59	-8.92	-8.15	0.77	0.77	0.5929		ΔG(27) -RT*ln{[exp(-ΔΔG(27~59a)/RT)+exp(-ΔΔG(27~59b)/RT)]/2.0}
60	60	-8.86	-8.684	0.176	0.176	0.030976		ΔG(27)-ΔΔG(rs~27) + ΔΔG(rs~60)
23	23	-8.77	-8.421	0.349	0.349	0.121801		ΔG(27)-ΔΔG(rs~27) -RT*ln{[exp(-ΔΔG(rs~23a)/RT)+exp(-ΔΔG(rs~23b)/RT)]/2.0}
61	61	-8.03	-9.405	-1.375	1.375	1.89062		ΔG(27)-ΔΔG(rs~27) + ΔΔG(rs~61)
62	62	-7.91	-9.15	-1.24	1.24	1.5376		ΔG(27)-ΔΔG(rs~27) -RT*ln{[exp(-ΔΔG(rs~62a)/RT)+exp(-ΔΔG(rs~62b)/RT)]/2.0}
63	63	-9.01	-9.883	-0.873	0.873	0.762129		ΔG(27)-ΔΔG(rs~27) + ΔΔG(rs~63)
64	64	-9.44	-8.76	0.68	0.68	0.4624		ΔG(27)-ΔΔG(rs~27) -RT*ln{[exp(-ΔΔG(rs~64a)/RT)+exp(-ΔΔG(rs~64b)/RT)]/2.0}
65	65	-8.36	-9.39	-1.03	1.03	1.0609		ΔG(27)-ΔΔG(rs~27) + ΔΔG(rs~65)
66	66	-8.38	-8.765	-0.385	0.385	0.148225		ΔG(27)-ΔΔG(rs~27) -RT*ln{[exp(-ΔΔG(rs~66a)/RT)+exp(-ΔΔG(rs~66b)/RT)]/2.0}
67	67	-7.53	-8.447	-0.917	0.917	0.840889		ΔG(27)-ΔΔG(ro~27) + ΔΔG(ro~67)
26	26	-8.19	-7.477	0.713	0.713	0.508369		ΔG(27)-ΔΔG(ro~27) -RT*ln{[exp(-ΔΔG(ro~26a)/RT)+exp(-ΔΔG(ro~26b)/RT)]/2.0}
68	68	-7.64	-9.254	-1.614	1.614	2.605		ΔG(27)-ΔΔG(ro~27) -RT*ln{[exp(-ΔΔG(ro~68a)/RT)+exp(-ΔΔG(ro~68b)/RT)]/2.0}
#	#min	-9.9	-10.796
#	#max	-5.74	-6.08
#	#MSE	#	#	-0.412
#	#MUE	#	#	0.807	0.807068
#	#RMSE	#	#	0.984		0.983689
#	#PI	#	#	0.62
#	#r	#	#	0.646
R =	8.31446	J/mol/K
T =	298.15	K
RT =	0.592485	kcal/mol
Lig1	Lig2	exptΔΔG	calcΔΔG	SE	UE	SE^2			#muta	calcΔΔG
27	28	-0.5	-0.543	-0.043	0.043	0.001849		ΔΔG(27~28)	27~28	-0.543
27	29	-0.82	-0.751	0.069	0.069	0.004761		ΔΔG(27~29)	27~29	-0.751
27	30	-1.73	-0.744	0.986	0.986	0.972196		ΔΔG(27~30)	27~30	-0.744
27	31	-1.79	-2.222	-0.432	0.432	0.186624		ΔΔG(27~31)	27~31	-2.222
27	32	-0.46	-0.82	-0.36	0.36	0.1296		ΔΔG(27~32)	27~32	-0.82
27	33	-0.75	-1.486	-0.736	0.736	0.541696		ΔΔG(27~33)	27~33	-1.486
27	34	-0.75	-1.314	-0.564	0.564	0.318096		ΔΔG(27~34)	27~34	-1.314
27	35	-2.68	-2.658	0.022	0.022	0.000484		ΔΔG(27~35)	27~35	-2.658
27	36	-2.05	-2.961	-0.911	0.911	0.829921		ΔΔG(27~36)	27~36	-2.961
27	37	-2.82	-3.295	-0.475	0.475	0.225625		ΔΔG(27~37)	27~37	-3.295
27	38	-0.9	-2.29858	-1.39858	1.39858	1.95602		-RT*ln{[exp(-ΔΔG(27~38a)/RT)+exp(-ΔΔG(27~38b)/RT)]/2.0}	27~38a	-2.628
27	39	-0.9	-2.613	-1.713	1.713	2.93437		ΔΔG(27~39)	27~38b	-1.492
27	40	-1.13	-3.4685	-2.3385	2.3385	5.4686		-RT*ln{[exp(-ΔΔG(27~40a)/RT)+exp(-ΔΔG(27~40b)/RT)]/2.0}	27~39	-2.613
27	41	-1.01	-2.342	-1.332	1.332	1.77422		ΔΔG(27~41)	27~40a	-2.707
27	42	-2.76	-1.4585	1.3015	1.3015	1.69389		-RT*ln{[exp(-ΔΔG(27~42a)/RT)+exp(-ΔΔG(27~42b)/RT)]/2.0}	27~40b	-3.791
27	43	-0.91	-1.84169	-0.931693	0.931693	0.868053		-RT*ln{[exp(-ΔΔG(27~43a)/RT)+exp(-ΔΔG(27~43b)/RT)]/2.0}	27~41	-2.342
27	44	-2.54	-3.3025	-0.762504	0.762504	0.581412		-RT*ln{[exp(-ΔΔG(27~44a)/RT)+exp(-ΔΔG(27~44b)/RT)]/2.0}	27~42a	-1.106
27	45	-2.82	-3.2091	-0.3891	0.3891	0.151399		-RT*ln{[exp(-ΔΔG(27~45a)/RT)+exp(-ΔΔG(27~45b)/RT)]/2.0}	27~42b	-1.678
27	46	-1.47	-2.54904	-1.07904	1.07904	1.16433		-RT*ln{[exp(-ΔΔG(27~46a)/RT)+exp(-ΔΔG(27~46b)/RT)]/2.0}	27~43a	-1.954
27	47	0.34	-1.69479	-2.03479	2.03479	4.14039		-RT*ln{[exp(-ΔΔG(27~47a)/RT)+exp(-ΔΔG(27~47b)/RT)]/2.0}	27~43b	-1.703
27	48	-0.54	-0.344807	0.195193	0.195193	0.0381003		-RT*ln{[exp(-ΔΔG(27~48a)/RT)+exp(-ΔΔG(27~48b)/RT)]/2.0}	27~44a	-3.267
27	49	-2.23	-2.907	-0.677	0.677	0.458329		ΔΔG(27~49)	27~44b	-3.336
27	50	-3.19	-4.716	-1.526	1.526	2.32868		ΔΔG(27~50)	27~45a	-3.562
27	51	-2.32	-2.56182	-0.241816	0.241816	0.0584748		-RT*ln{[exp(-ΔΔG(27~51a)/RT)+exp(-ΔΔG(27~51b)/RT)]/2.0}	27~45b	-2.212
27	52	-3.09	-2.628	0.462	0.462	0.213444		ΔΔG(27~52)	27~46a	-2.151
27	53	-3.82	-2.886	0.934	0.934	0.872356		ΔΔG(27~53)	27~46b	-2.785
27	54	-3.64	-3.09379	0.546208	0.546208	0.298343		-RT*ln{[exp(-ΔΔG(27~54a)/RT)+exp(-ΔΔG(27~54b)/RT)]/2.0}	27~47a	-1.988
27	55	-3.72	-3.73546	-0.0154637	0.0154637	0.000239125		-RT*ln{[exp(-ΔΔG(27~55a)/RT)+exp(-ΔΔG(27~55b)/RT)]/2.0}	27~47b	-1.089
27	56	-3.12	-2.953	0.167	0.167	0.027889		ΔΔG(27~56)	27~48a	-0.021
27	57	-2.9	-1.5702	1.3298	1.3298	1.76838		-RT*ln{[exp(-ΔΔG(27~57a)/RT)+exp(-ΔΔG(27~57b)/RT)]/2.0}	27~48b	-0.553
27	58	-3.27	-4.685	-1.415	1.415	2.00222		ΔΔG(27~58)	27~49	-2.907
27	59	-2.84	-2.06985	0.770149	0.770149	0.593129		-RT*ln{[exp(-ΔΔG(27~59a)/RT)+exp(-ΔΔG(27~59b)/RT)]/2.0}	27~50	-4.716
#	#RMSE	#	#	#	#	1.00938			27~51a	-2.6
#	#MUE	#	#	#	0.817448				27~51b	-2.521
									27~52	-2.628
									27~53	-2.886
									27~54a	-2.848
									27~54b	-3.267
									27~55a	-2.347
									27~55b	-4.117
									27~56	-2.953
									27~57a	-1.756
									27~57b	-1.298
									27~58	-4.685
									27~59a	-1.77
									27~59b	-2.268
									ro~26a	-1.184
									ro~26b	-1.569
									ro~27	-0.01
									ro~67	-2.377
									ro~68a	-3.181
									ro~68b	-3.187
									rs~23a	-1.773
									rs~23b	-1.981
									rs~27	0.455
									rs~60	-2.149
									rs~61	-2.87
									rs~62a	-2.188
									rs~62b	-2.861
									rs~63	-3.348
									rs~64a	-2.431
									rs~64b	-1.908
									rs~65	-2.855
									rs~66a	-1.776
									rs~66b	-2.484

## Sheet: ptp1b
PTP1B system
ΔG: binding free energy for a ligand
ΔΔG: relative binding free energy for a mutation pair
SE: signed error
UE: unsigned error
SchrodingerID	ligands	exptΔG	calcΔG	SE	UE	SE^2		formula to derive calcΔG
23466	8	-7.871	-7.871	0	0	0		exptΔG(8)
NA	3	-7.496	-7.802	-0.306	0.306	0.093636		ΔG(8) – ΔΔG(3~8)
NA	9	-8.185	-7.977	0.208	0.208	0.043264		ΔG(3) + ΔΔG(3~9)
23467	10	-7.364	-8.196	-0.832	0.832	0.692224		ΔG(9) + ΔΔG(9~10)
23468	11	-7.775	-8.16	-0.385	0.385	0.148225		ΔG(8) + ΔΔG(8~11)
23469	12	-7.746	-7.674	0.072	0.072	0.005184		ΔG(8) + ΔΔG(8~12)
23470	13	-7.746	-8.54	-0.794	0.794	0.630436		ΔG(8) + ΔΔG(8~13)
23471	14	-7.775	-8.203	-0.428	0.428	0.183184		ΔG(8) + ΔΔG(8~14)
23472	15	-8.672	-8.408	0.264	0.264	0.069696		ΔG(8) + ΔΔG(8~15)
20669	16	-8.633	-7.575	1.058	1.058	1.11936		ΔG(8) + ΔΔG(8~16)
23473	17	-8.414	-8.17	0.244	0.244	0.059536		ΔG(9) + ΔΔG(9~17)
23474	18	-9.139	-8.412	0.727	0.727	0.528529		ΔG(8) + ΔΔG(8~18)
20670	19	-9.11	-8.622	0.488	0.488	0.238144		ΔG(8) + ΔΔG(8~19)
23475	20	-8.743	-8.525	0.218	0.218	0.047524		ΔG(8) + ΔΔG(8~20)
23476	21	-9.442	-9.193	0.249	0.249	0.062001		ΔG(8) + ΔΔG(8~21)
23477	22	-8.879	-8.208	0.671	0.671	0.450241		ΔG(8) + ΔΔG(8~22)
23330	23	-10.155	-8.982	1.173	1.173	1.37593		ΔG(19) + ΔΔG(19~23)
NA	26	-7.395	-7.404	-0.009	0.009	8.1e-05		ΔG(8) + ΔΔG(8~26)
23479	27	-9.169	-7.577	1.592	1.592	2.53446		ΔG(26) + ΔΔG(26~27)
23480	28	-8.743	-8.416	0.327	0.327	0.106929		ΔG(26) + ΔΔG(26~28)
NA	29	-8.899	-8.023	0.876	0.876	0.767376		ΔG(26) + ΔΔG(26~29)
23482	30	-10.036	-10.458	-0.422	0.422	0.178084		ΔG(26) + ΔΔG(26~30)
23483	31	-9.904	-8.623	1.281	1.281	1.64096		ΔG(26) + ΔΔG(26~31)
20667	32	-11.457	-10.514	0.943	0.943	0.889249		ΔG(30) + ΔΔG(30~32)
23484	33	-7.775	-9.4	-1.625	1.625	2.64062		ΔG(32) + ΔΔG(32~33)
23485	34	-11.046	-8.834	2.212	2.212	4.89294		ΔG(32) + ΔΔG(32~34)
23486	35	-12.507	-10.665	1.842	1.842	3.39296		ΔG(32) + ΔΔG(32~35)
#	#min	-12.507	-10.665
#	#max	-7.364	-7.404
#	#MSE	#	#	0.357
#	#MUE	#	#	0.713	0.712815
#	#RMSE	#	#	0.919		0.918751
#	#PI	#	#	0.734
#	#r	#	#	0.749
Lig1	Lig2	exptΔΔG	calcΔΔG	SE	UE	SE^2
3	8	-0.375	-0.069	0.306	0.306	0.093636
3	9	-0.689	-0.175	0.514	0.514	0.264196
8	11	0.096	-0.289	-0.385	0.385	0.148225
8	12	0.125	0.197	0.072	0.072	0.005184
8	13	0.125	-0.669	-0.794	0.794	0.630436
8	14	0.096	-0.332	-0.428	0.428	0.183184
8	15	-0.801	-0.537	0.264	0.264	0.069696
8	16	-0.762	0.296	1.058	1.058	1.11936
8	18	-1.268	-0.541	0.727	0.727	0.528529
8	19	-1.239	-0.751	0.488	0.488	0.238144
8	20	-0.872	-0.654	0.218	0.218	0.047524
8	21	-1.571	-1.322	0.249	0.249	0.062001
8	22	-1.008	-0.337	0.671	0.671	0.450241
8	26	0.476	0.467	-0.009	0.009	8.1e-05
9	10	0.821	-0.219	-1.04	1.04	1.0816
9	17	-0.229	-0.193	0.036	0.036	0.001296
19	23	-1.045	-0.36	0.685	0.685	0.469225
26	27	-1.774	-0.173	1.601	1.601	2.5632
26	28	-1.348	-1.012	0.336	0.336	0.112896
26	29	-1.504	-0.619	0.885	0.885	0.783225
26	30	-2.641	-3.054	-0.413	0.413	0.170569
26	31	-2.509	-1.219	1.29	1.29	1.6641
30	32	-1.421	-0.056	1.365	1.365	1.86322
32	33	3.682	1.114	-2.568	2.568	6.59462
32	34	0.411	1.68	1.269	1.269	1.61036
32	35	-1.05	-0.151	0.899	0.899	0.808201
#	#RMSE	#	#	#	#	0.910684
#	#MUE	#	#	#	0.714231
